# Supplementary material for: Initial understory response to experimental silvicultural treatments in a temperate oak-dominated forest
Source: Springer Nature journal article supplement (doi:10.1007/s10342-018-1154-8), 2018-11-27

Online Resource 3. Occurrence of the registered species in the different treatments

Initial understory response to experimental silvicultural treatments in a temperate oak-dominated forest

European Journal of Forest Research

Flóra Tinya\*, Bence Kovács, Aurora Prättälä, Péter Farkas, Réka Aszalós, Péter Ódor

\*Corresponding author. Hungarian Academy of Sciences, Centre for Ecological Research, Institute of Ecology and Botany, Alkotmány u. 2-4., H-2163 Vácraátót, Hungary. E-mail: tinya.flora@okologia.mta.hu

Fig. A3 Boxplots of the cover of the registered understory species in the different treatments, on plot level. C = control, CC = clear-cutting, G = gap-cutting, P = preparation cutting, R = retention tree group. Scaling of the different species is not uniform.

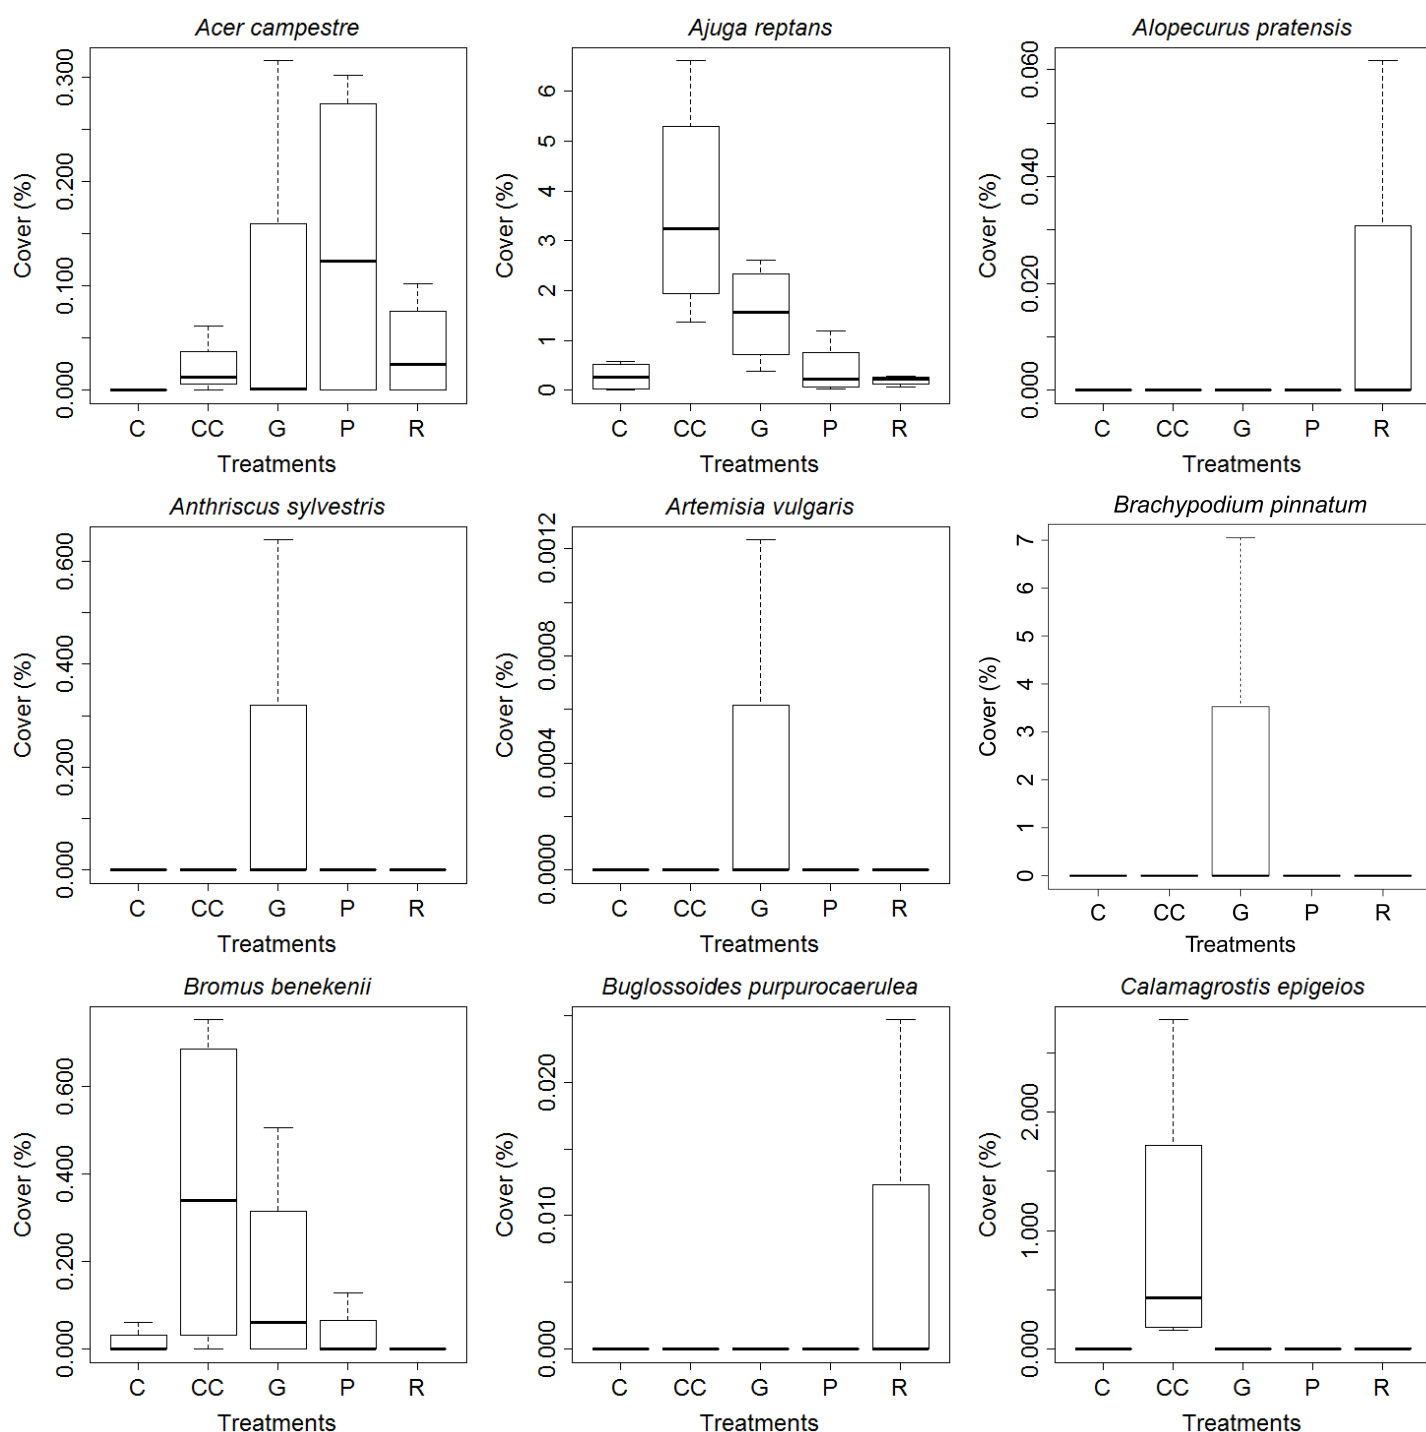

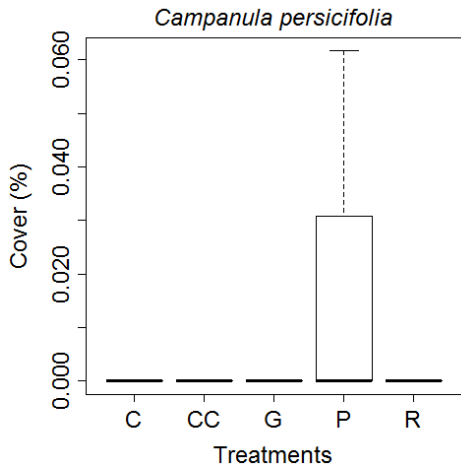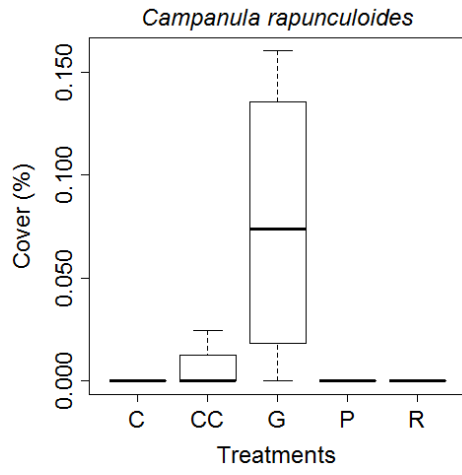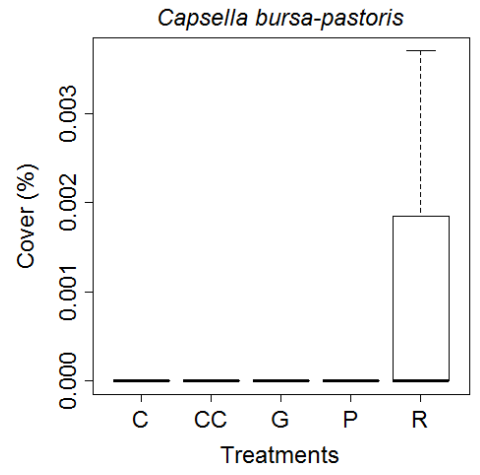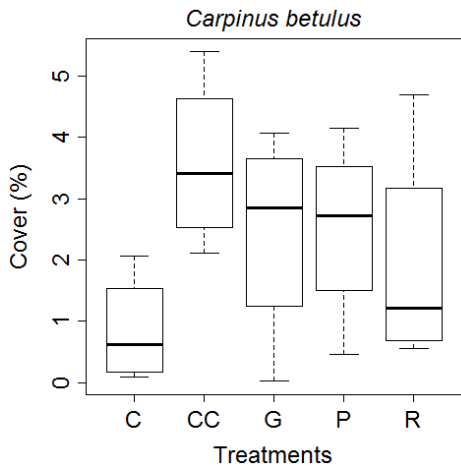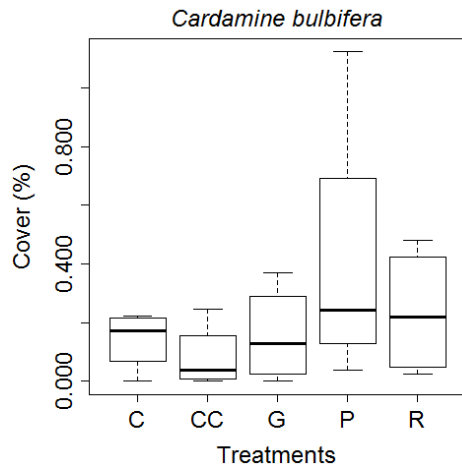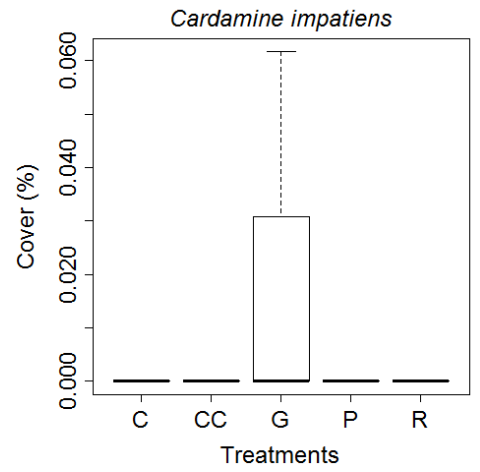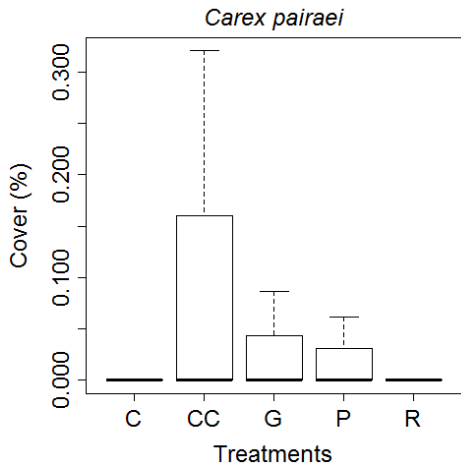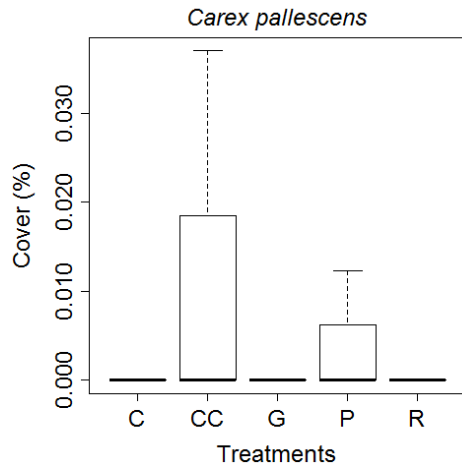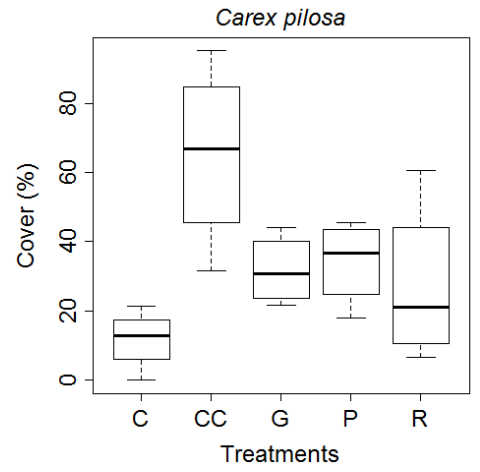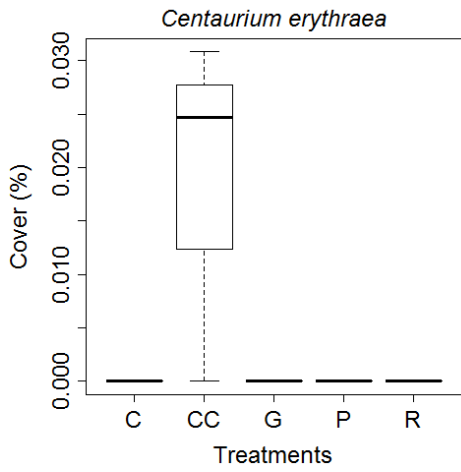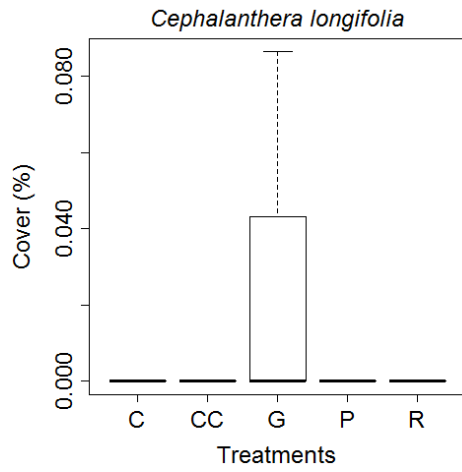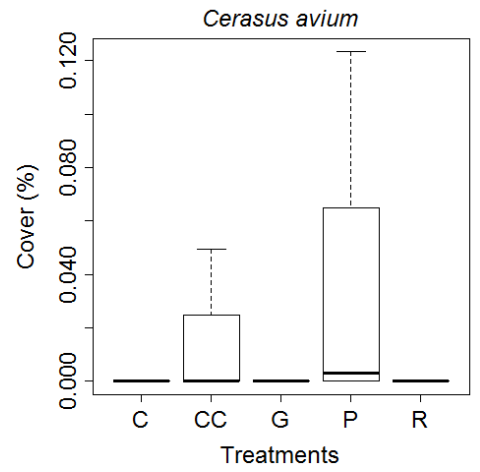

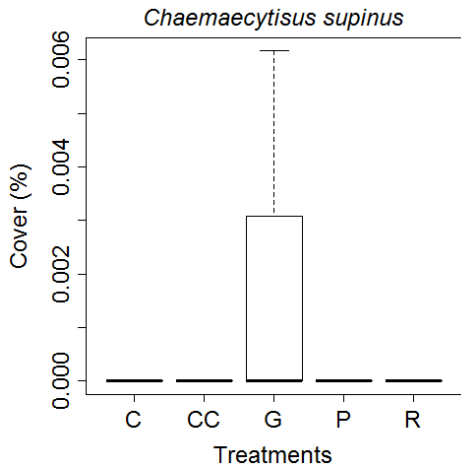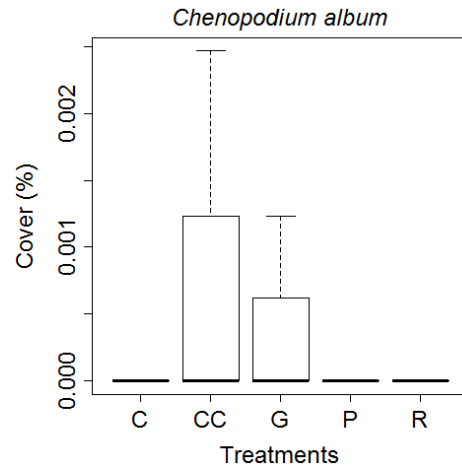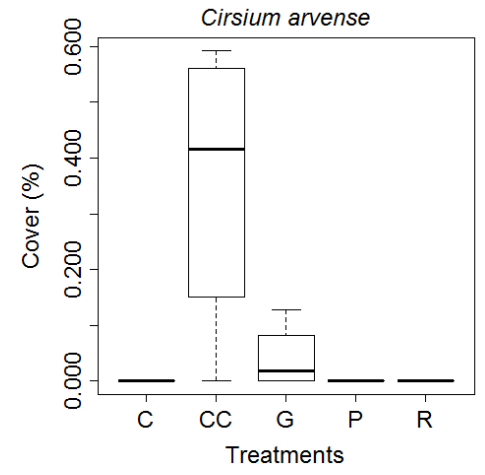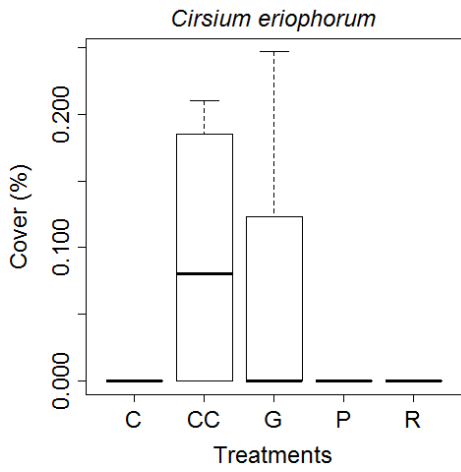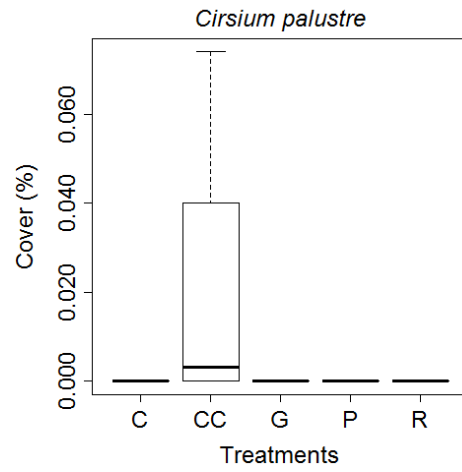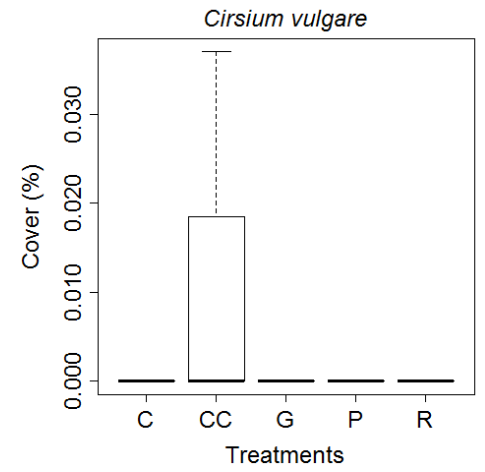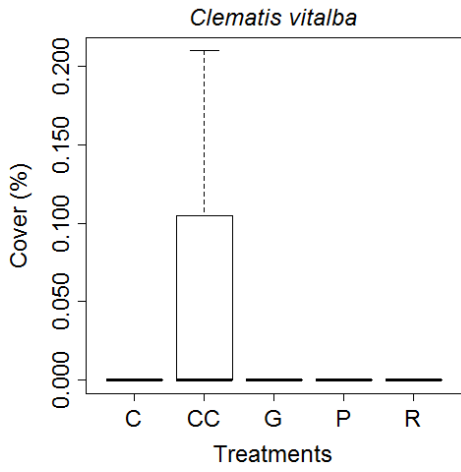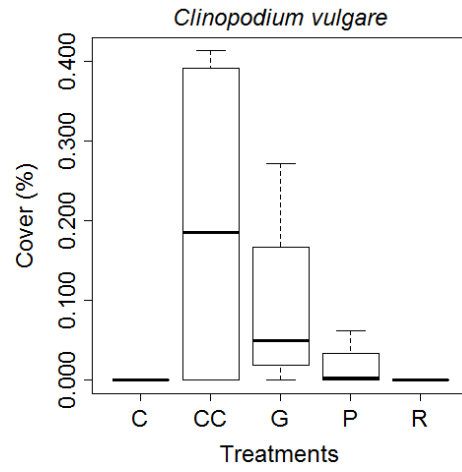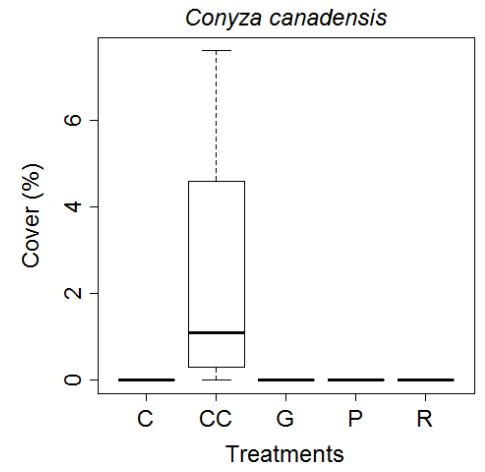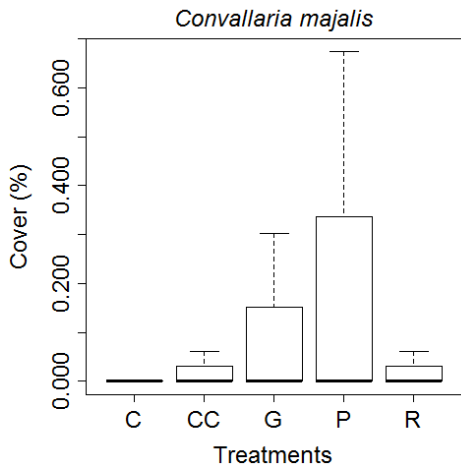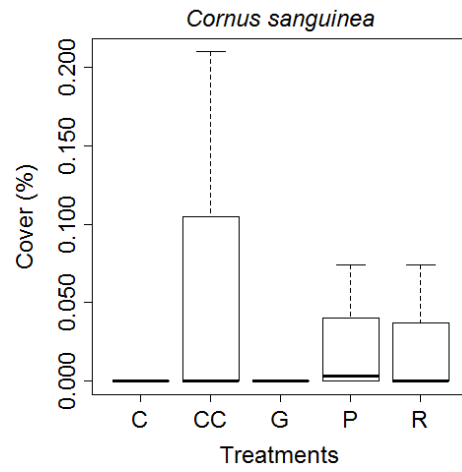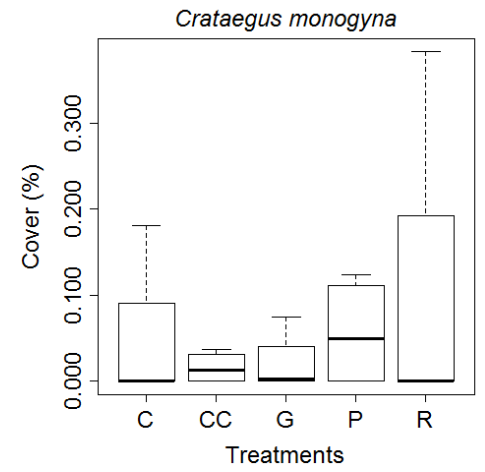

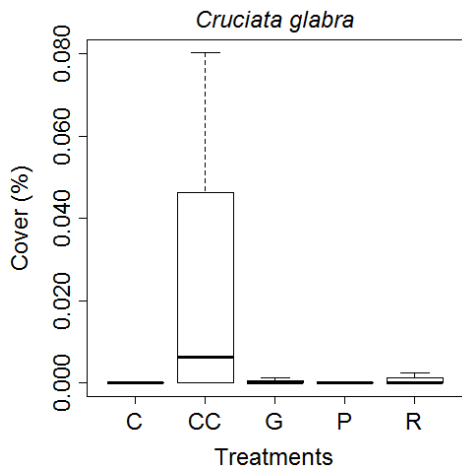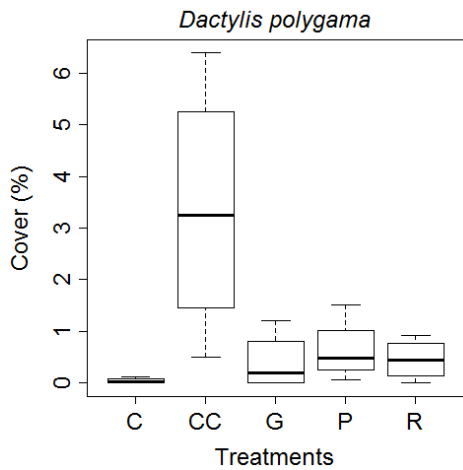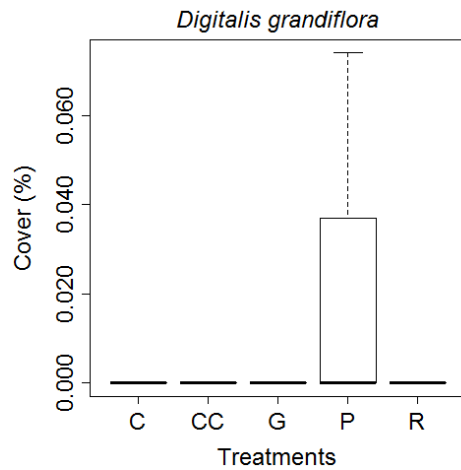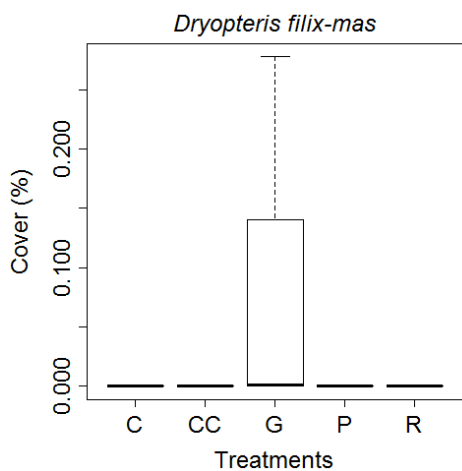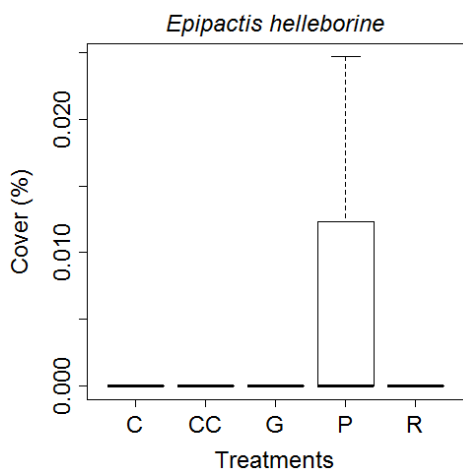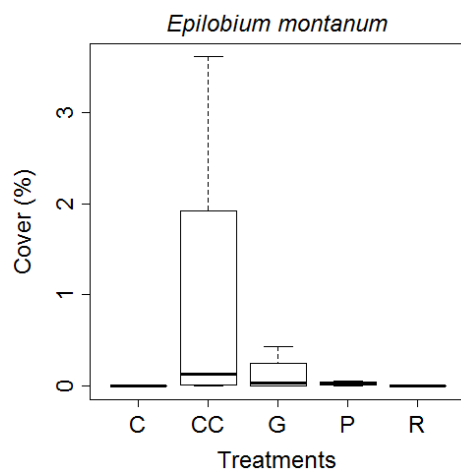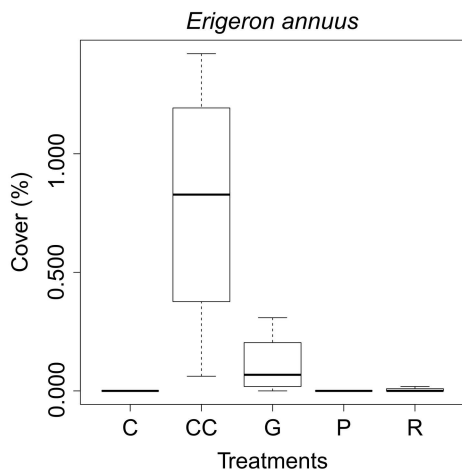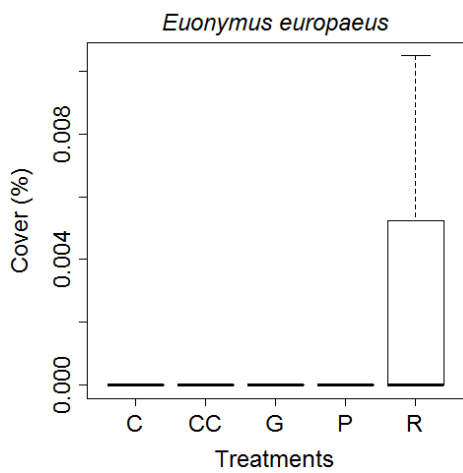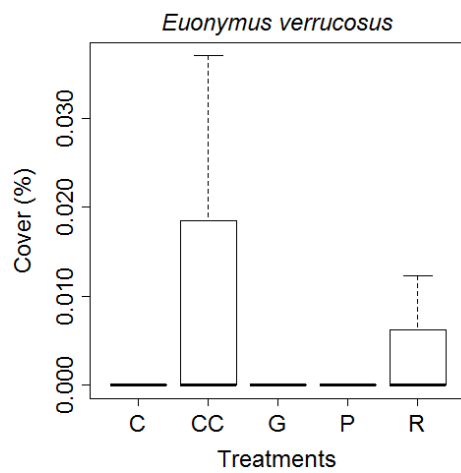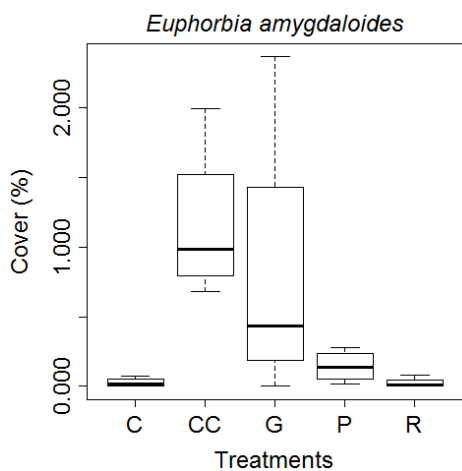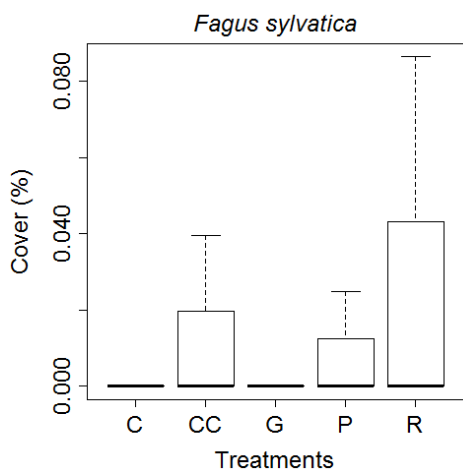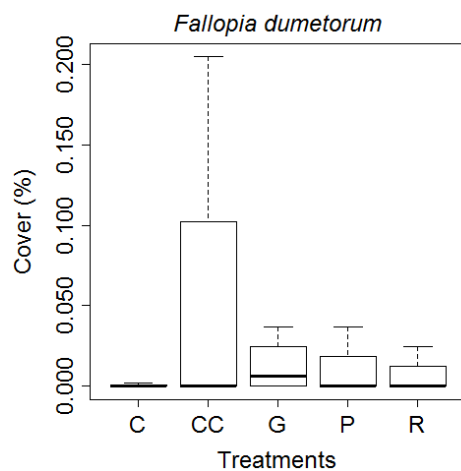

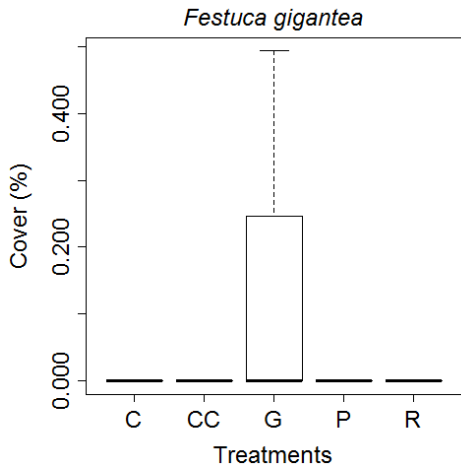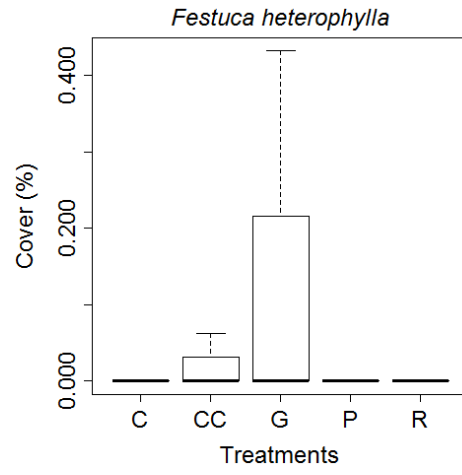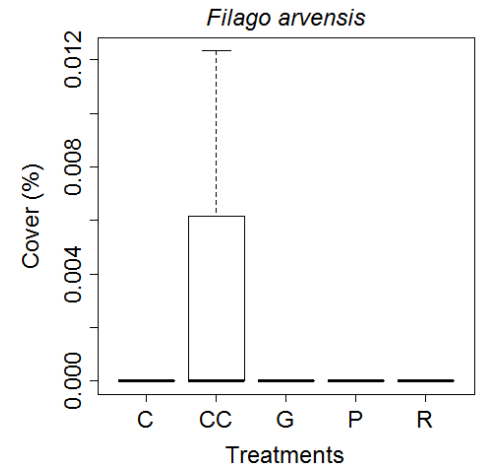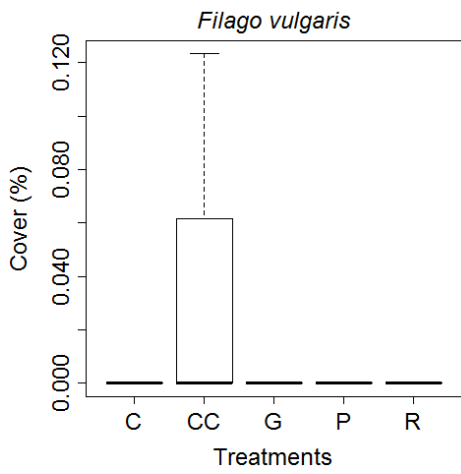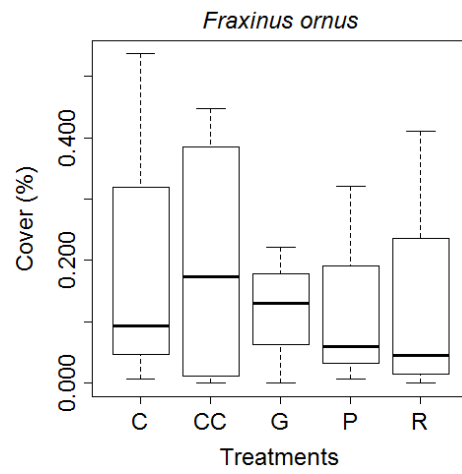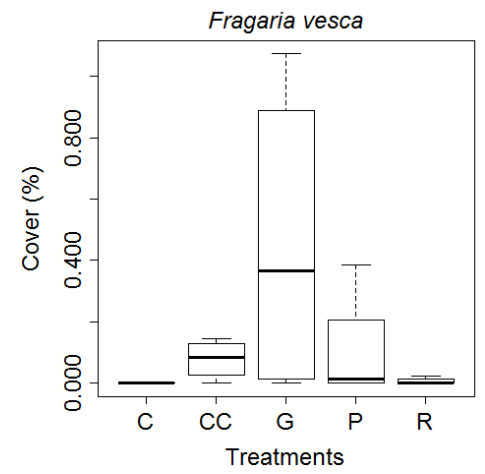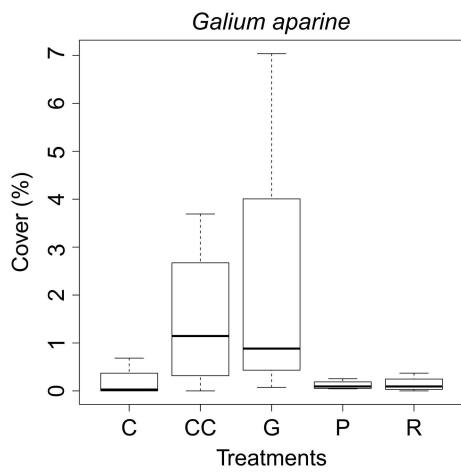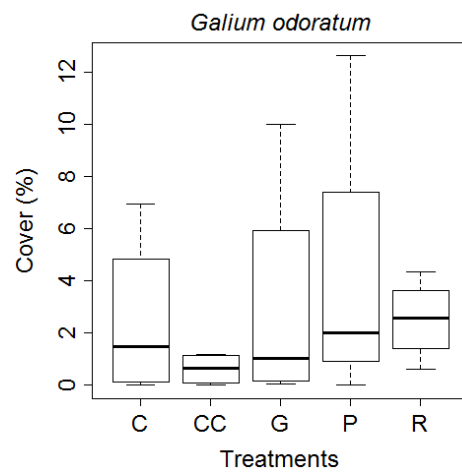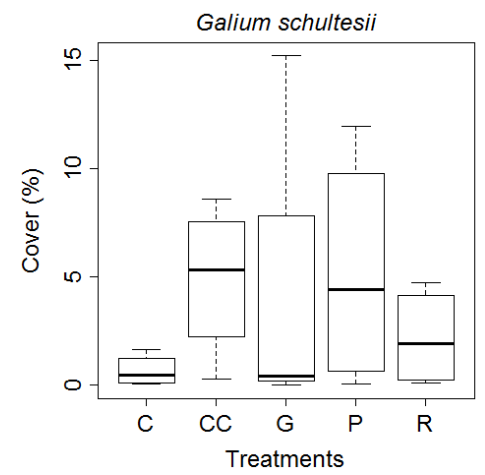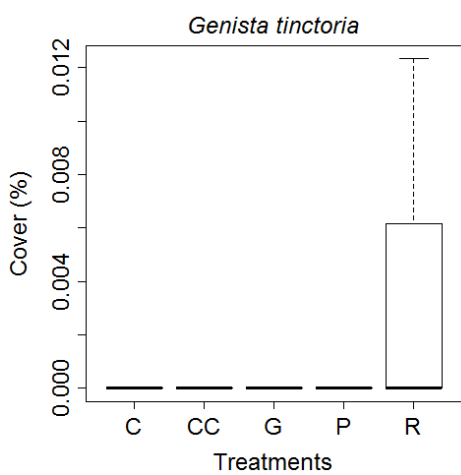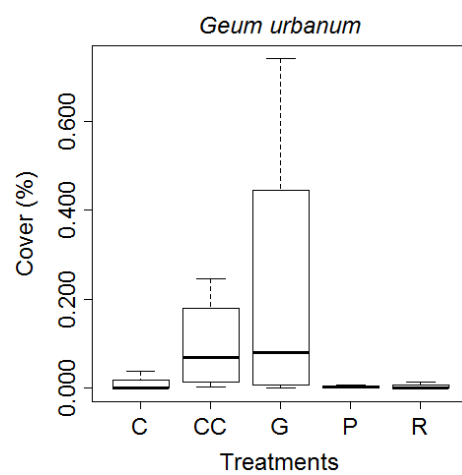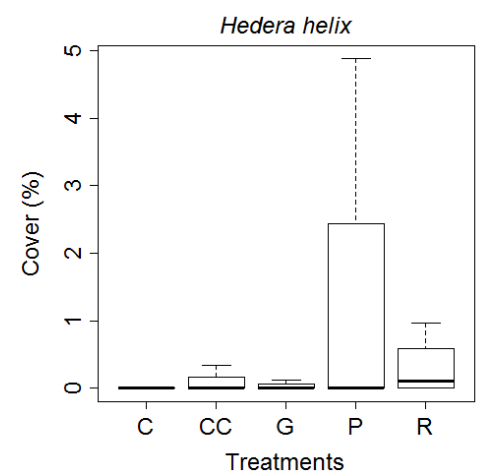

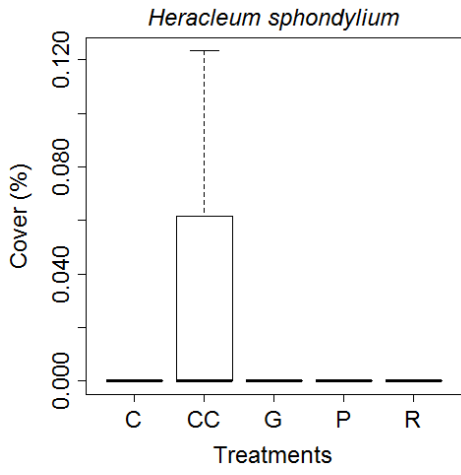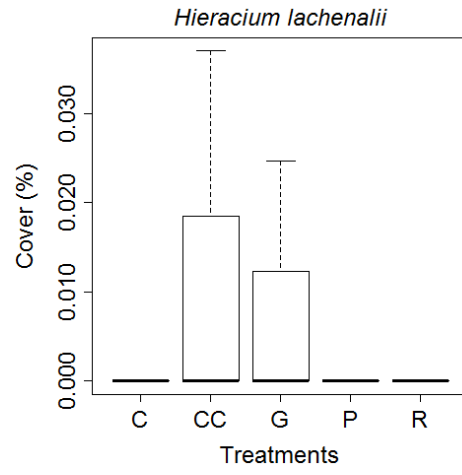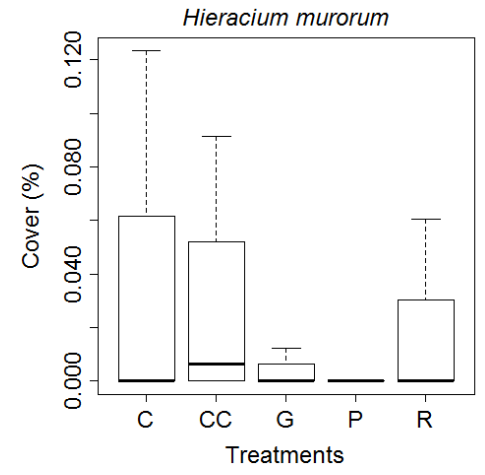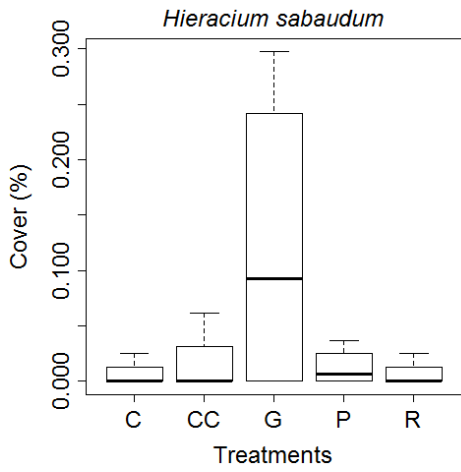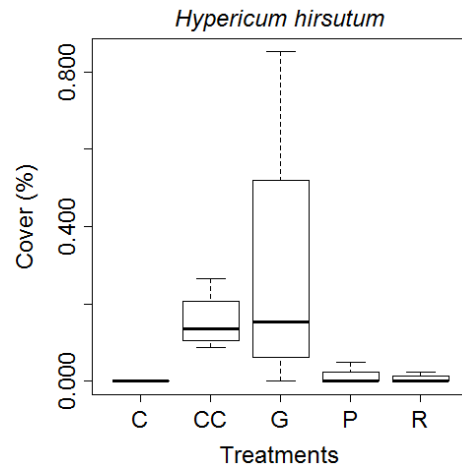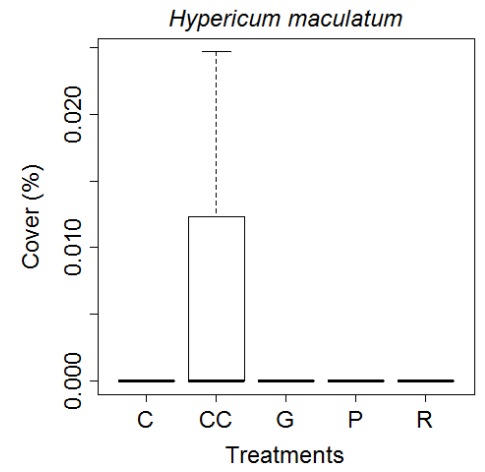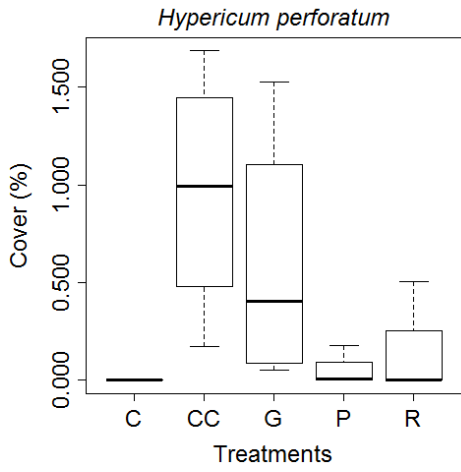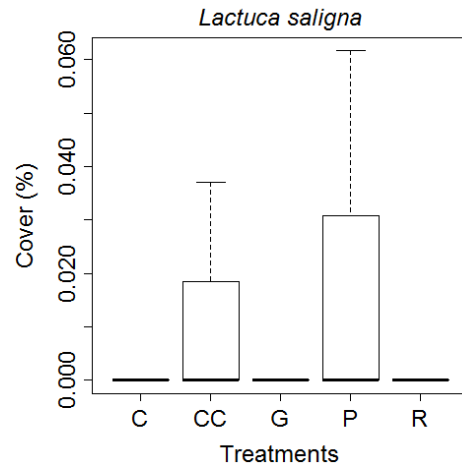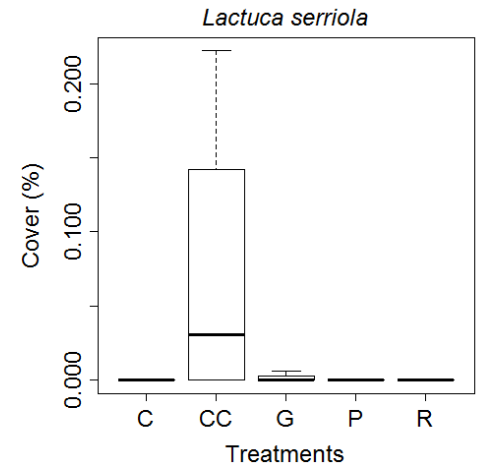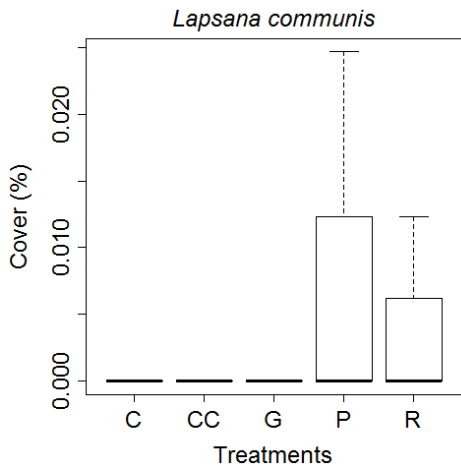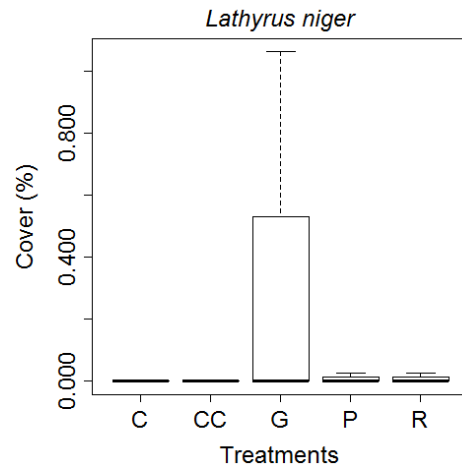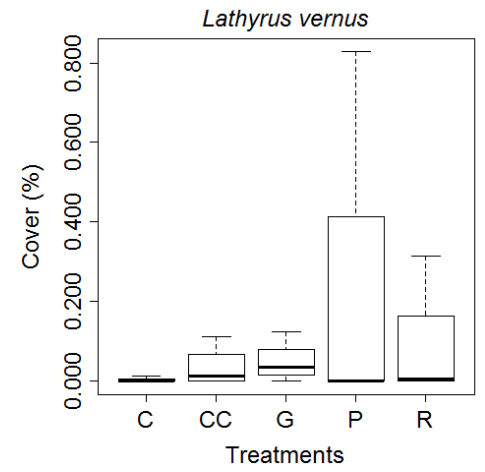

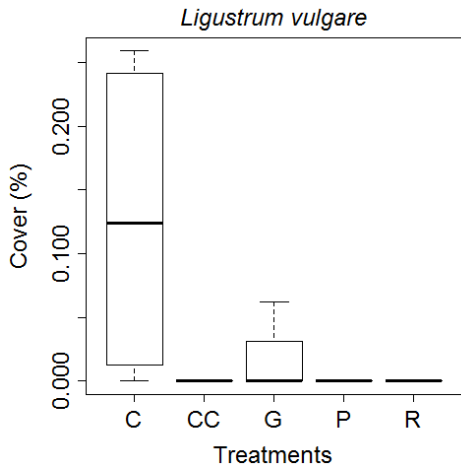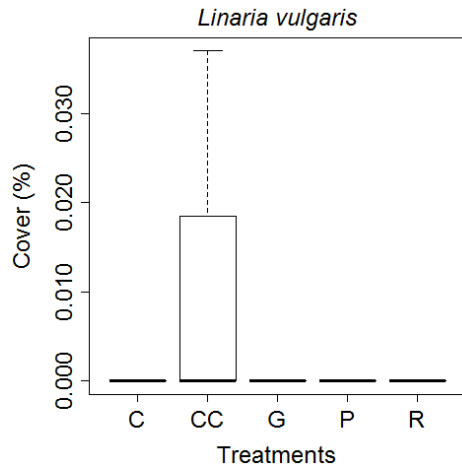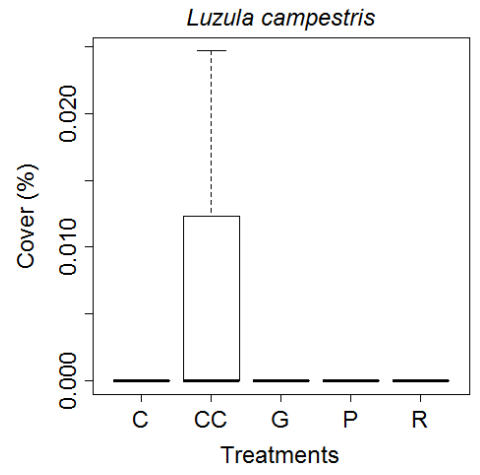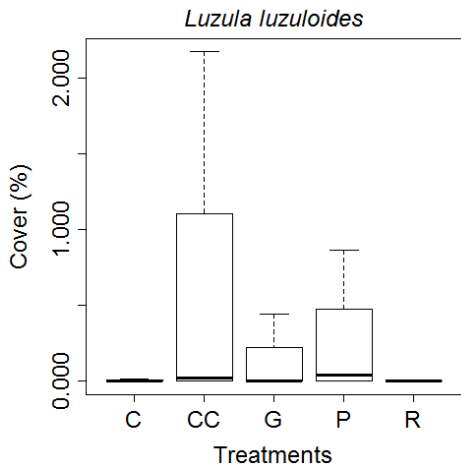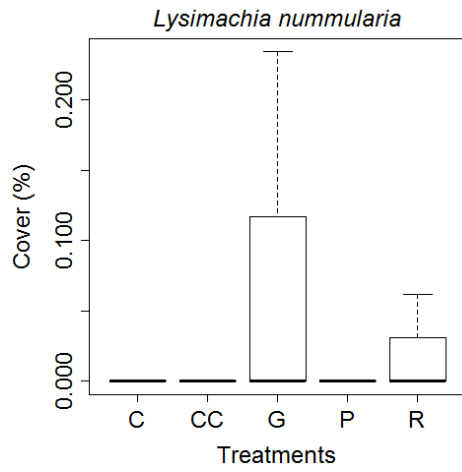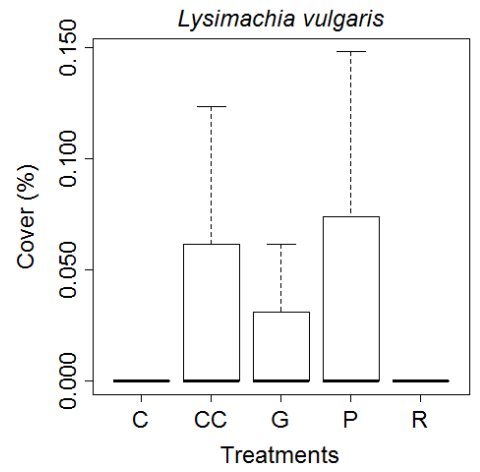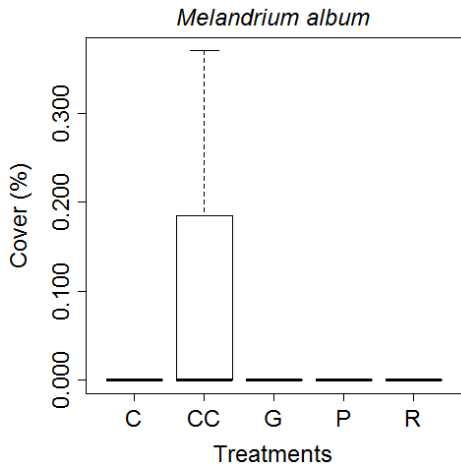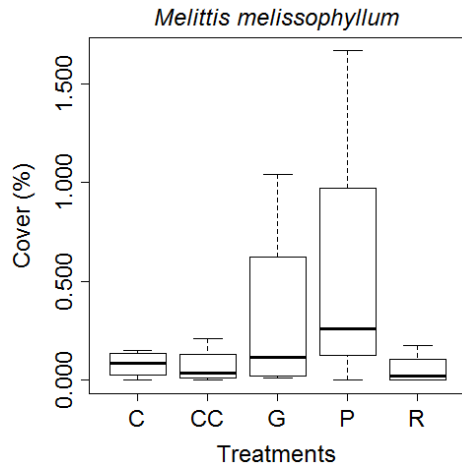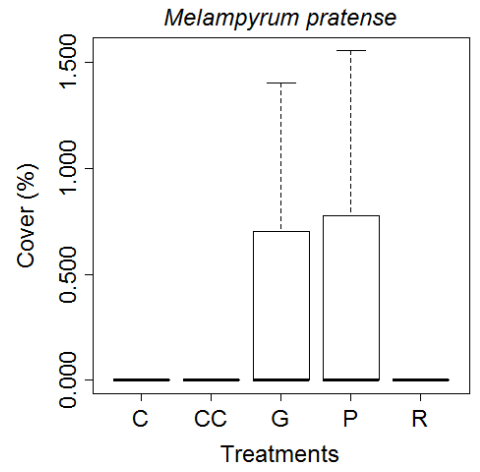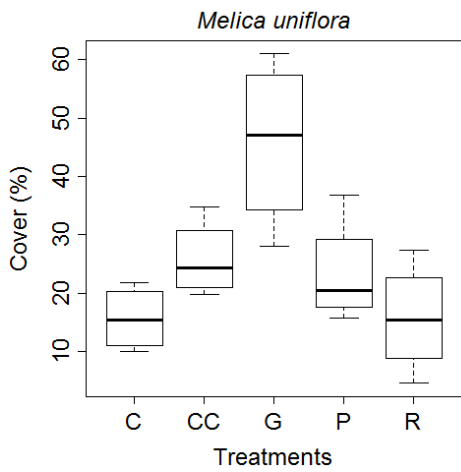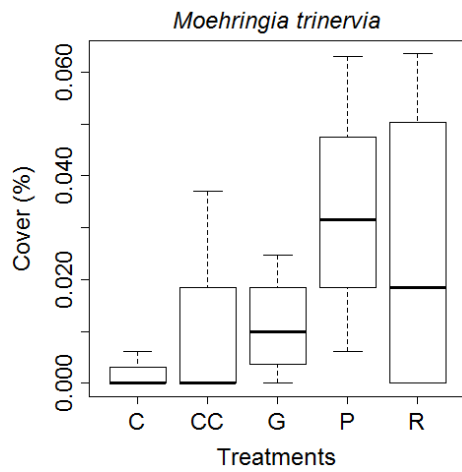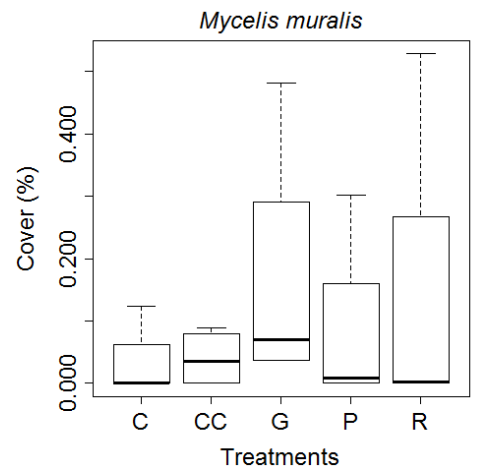

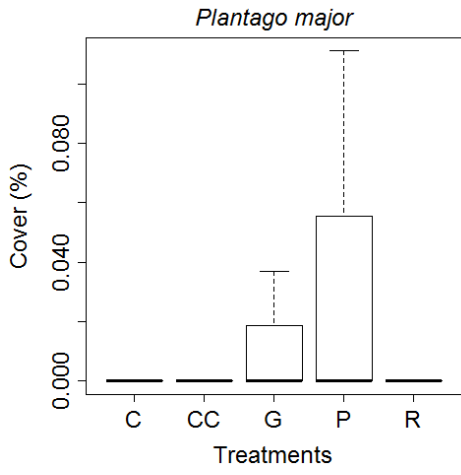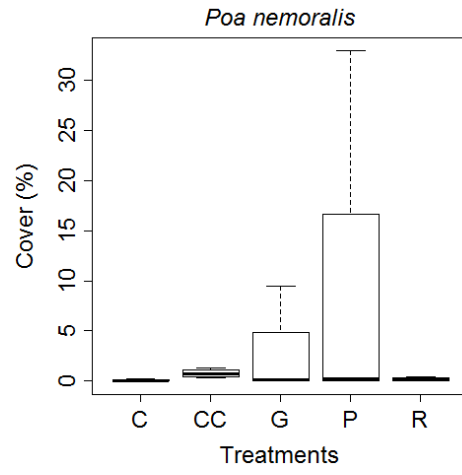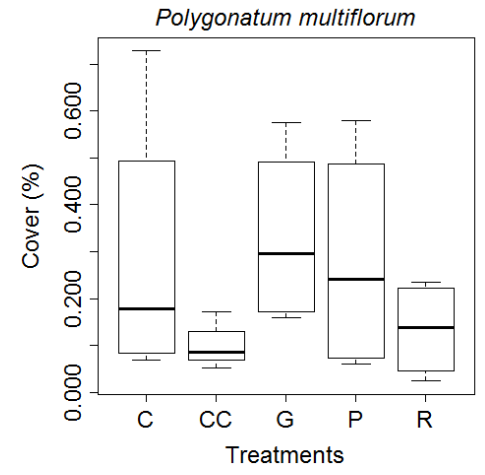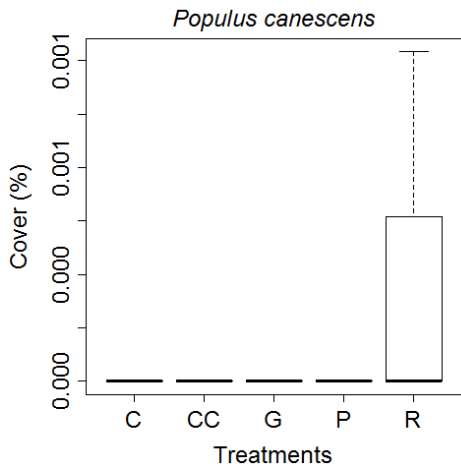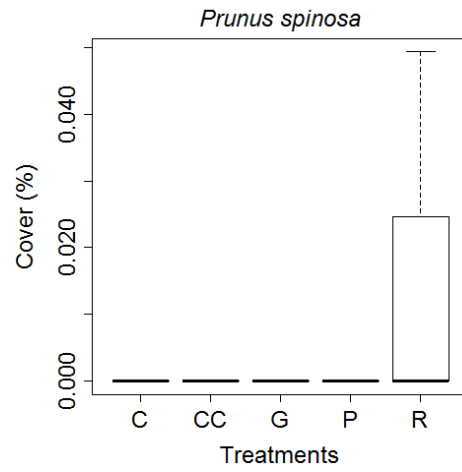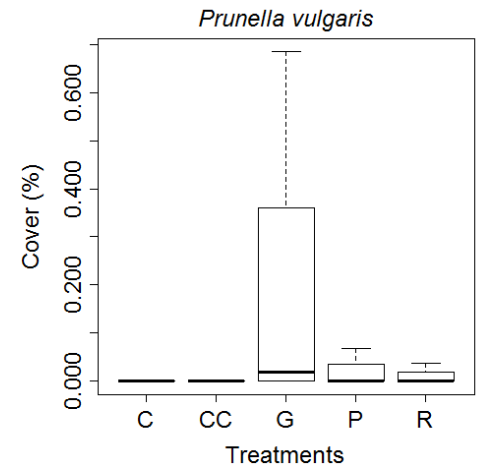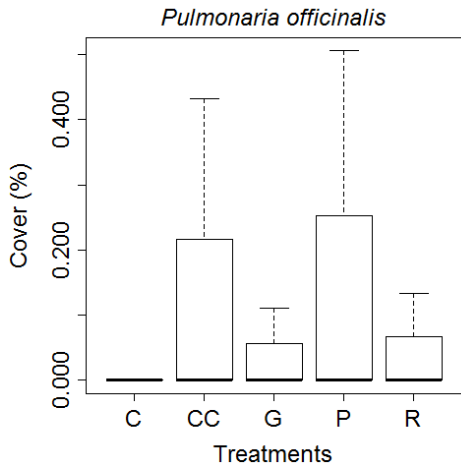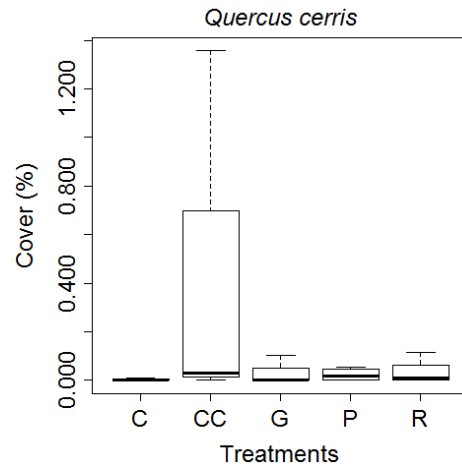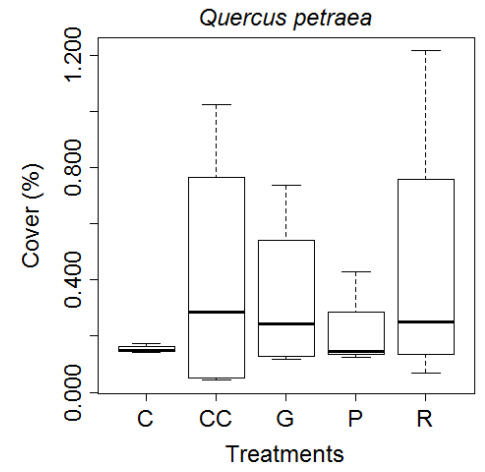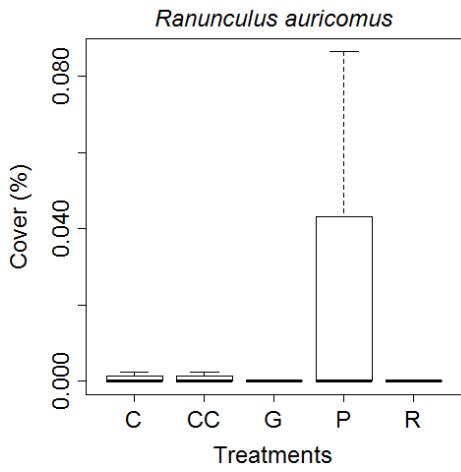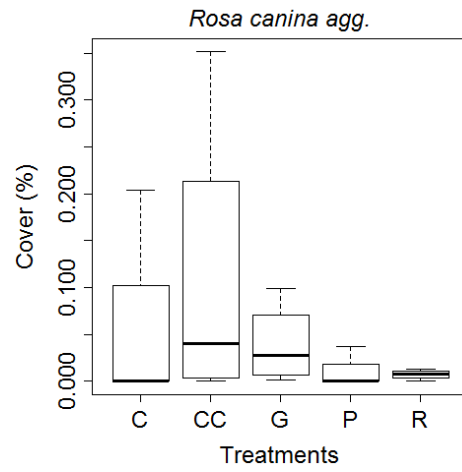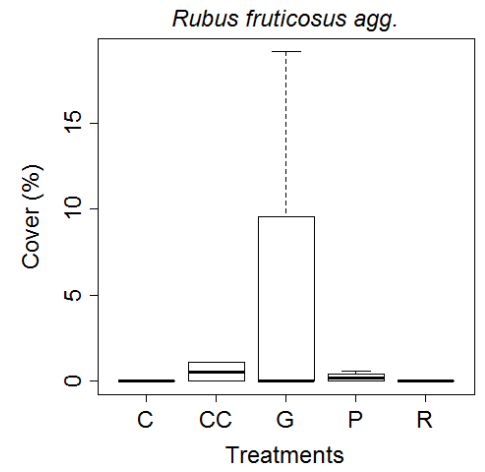



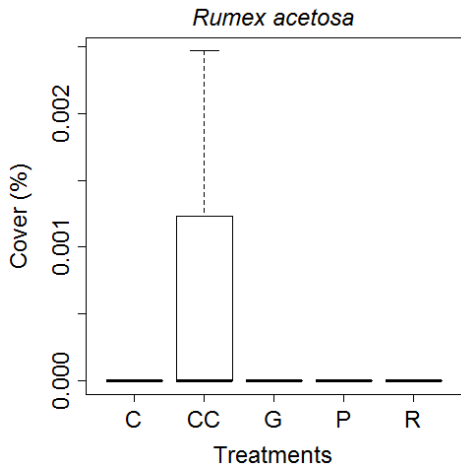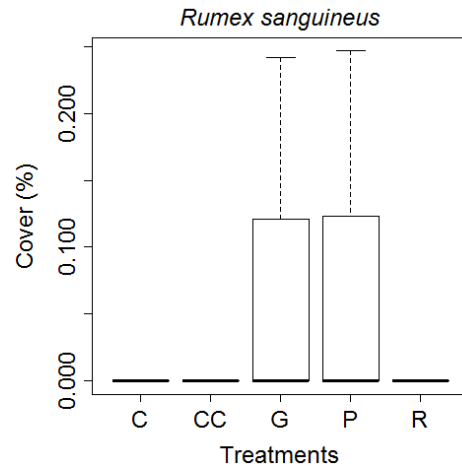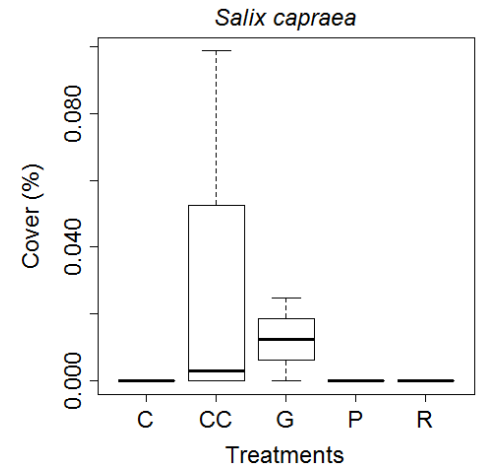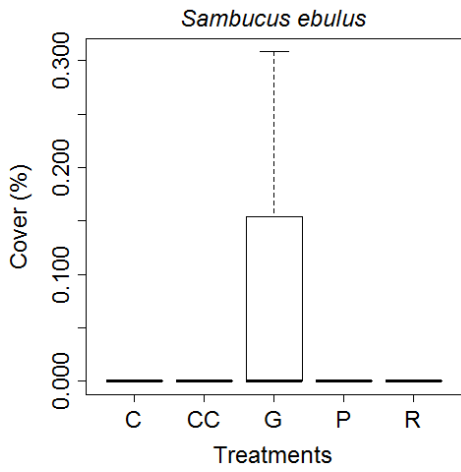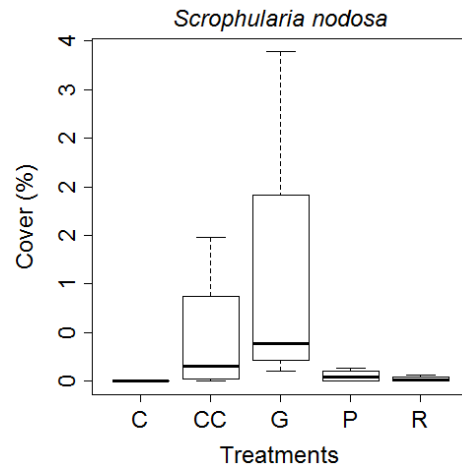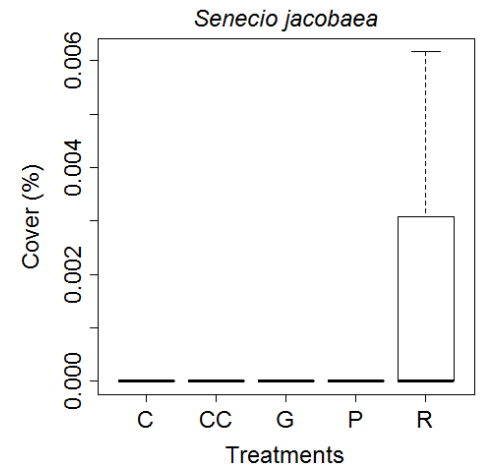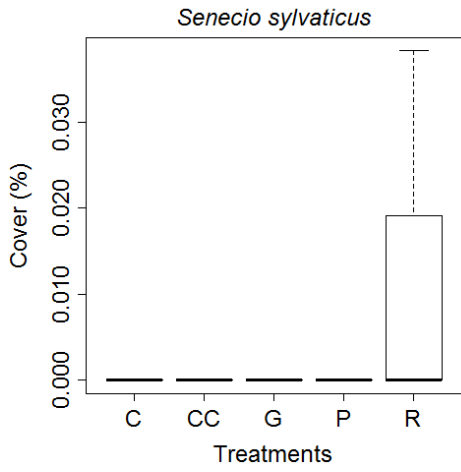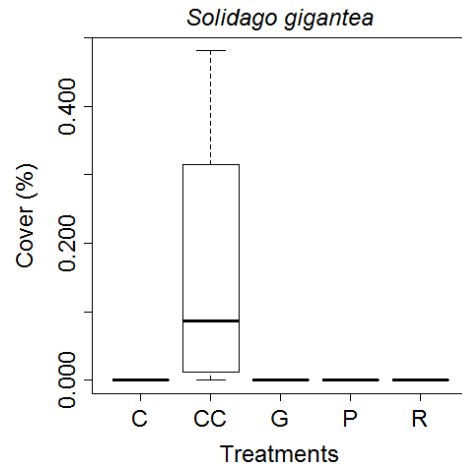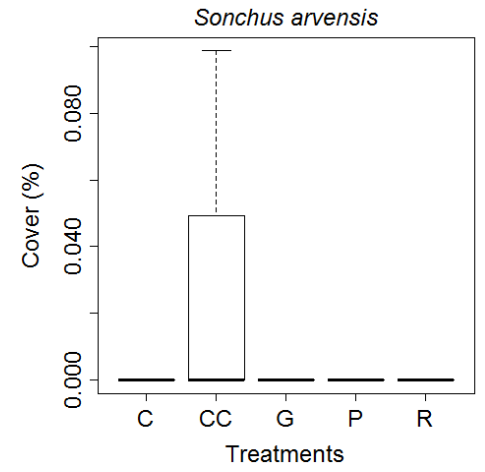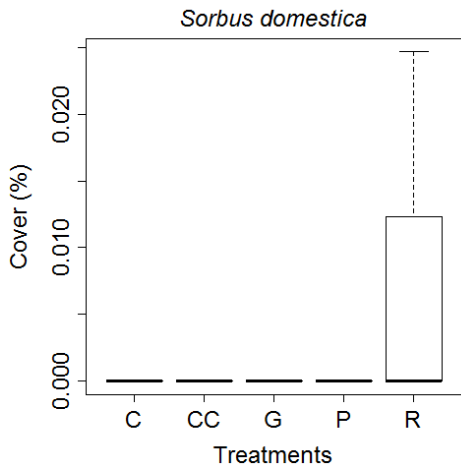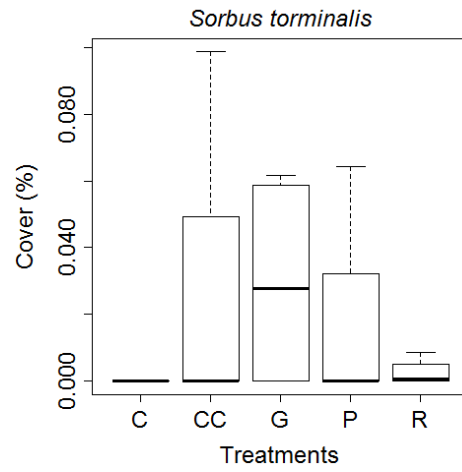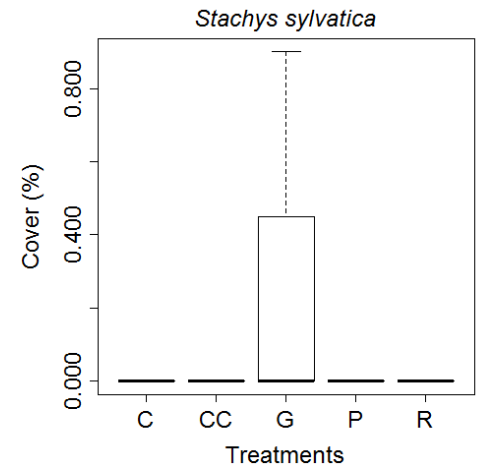

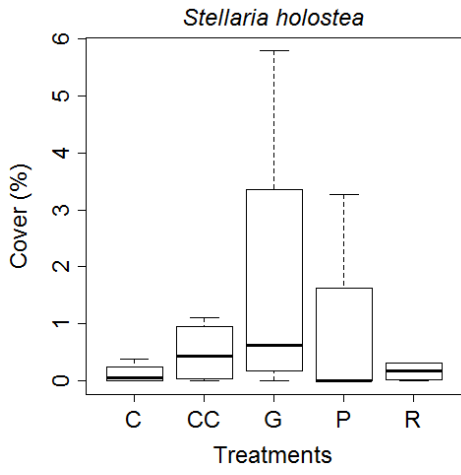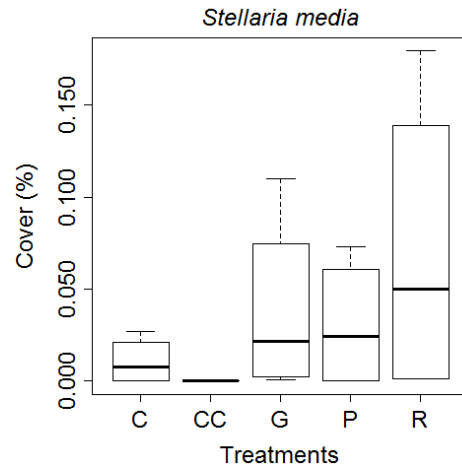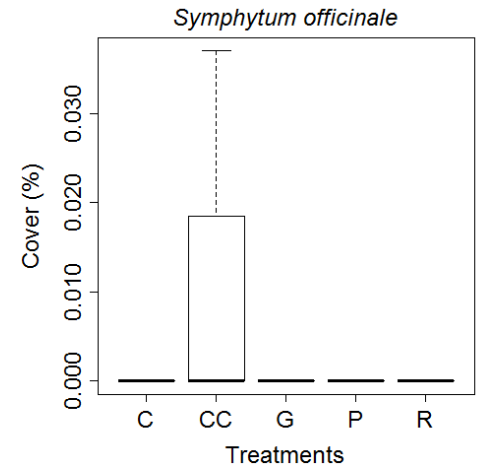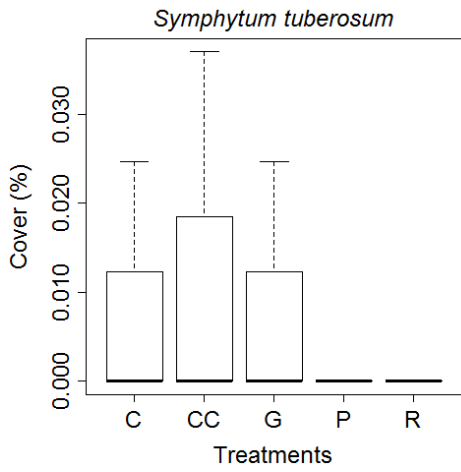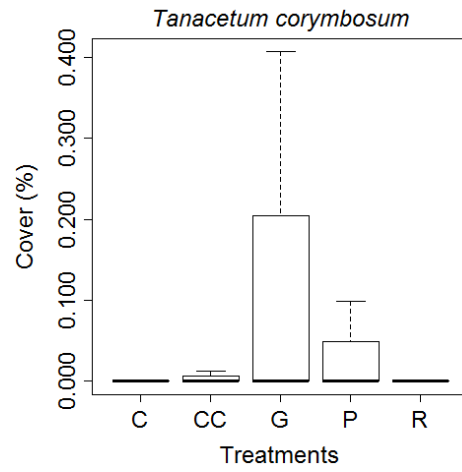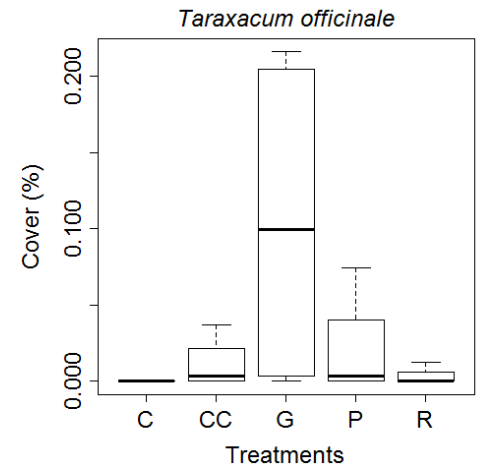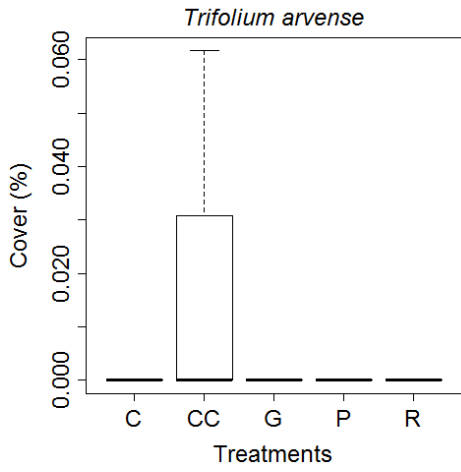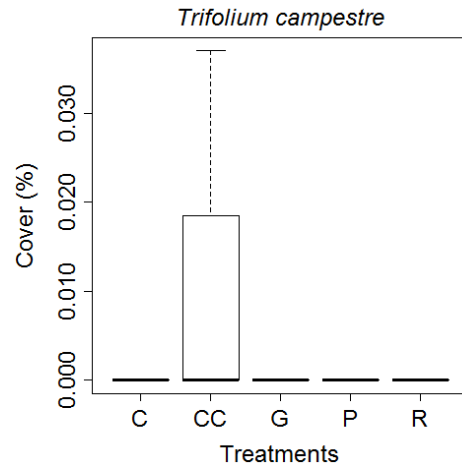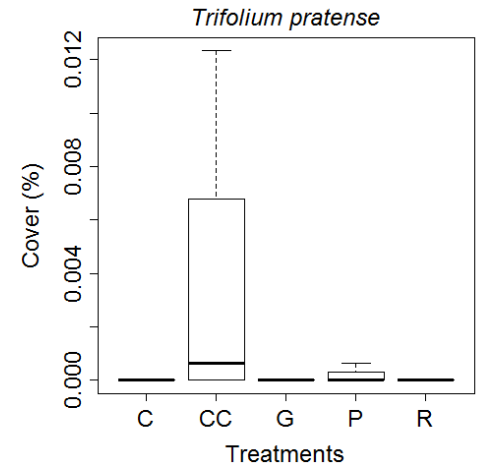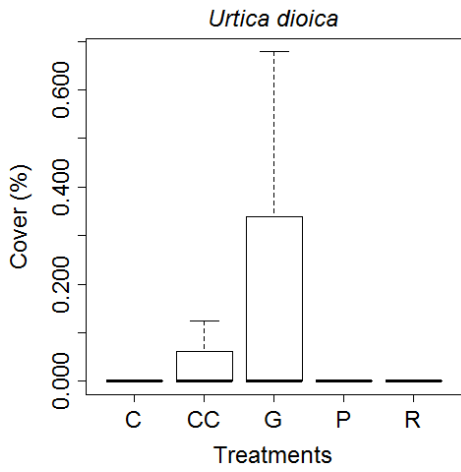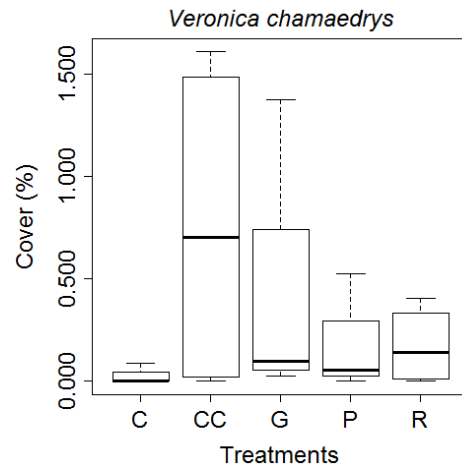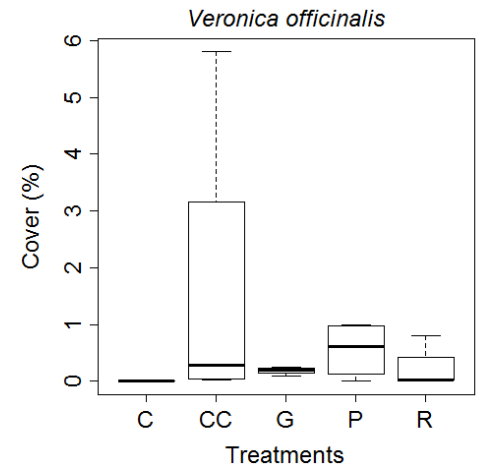

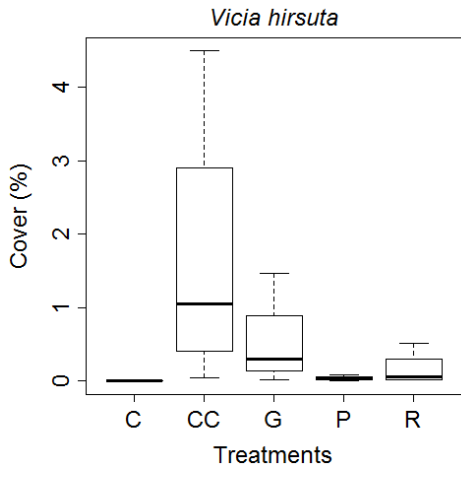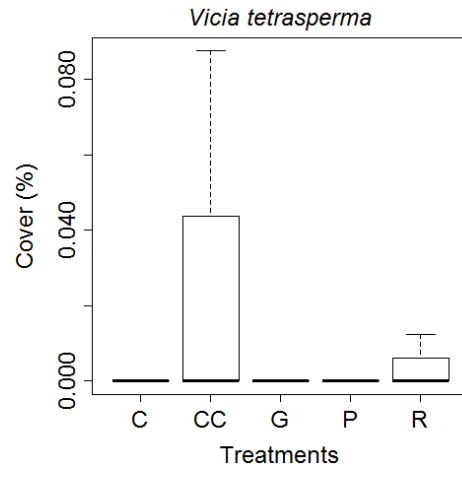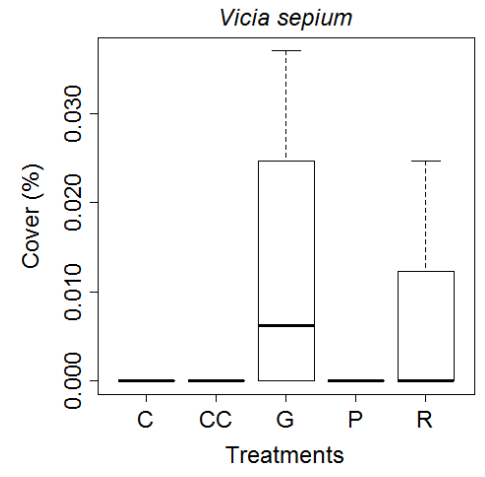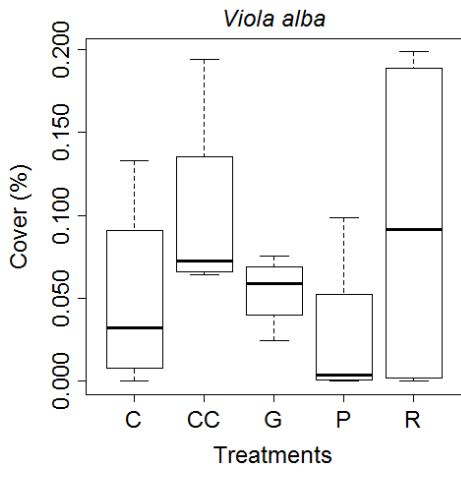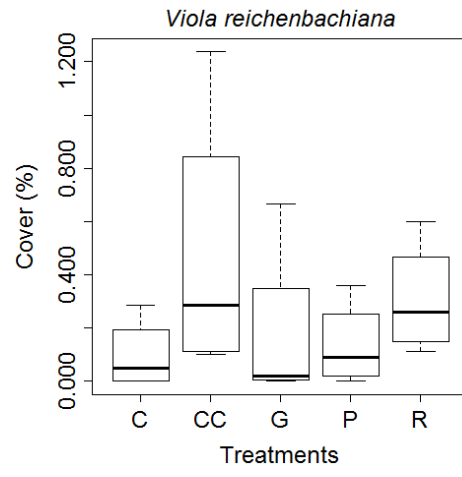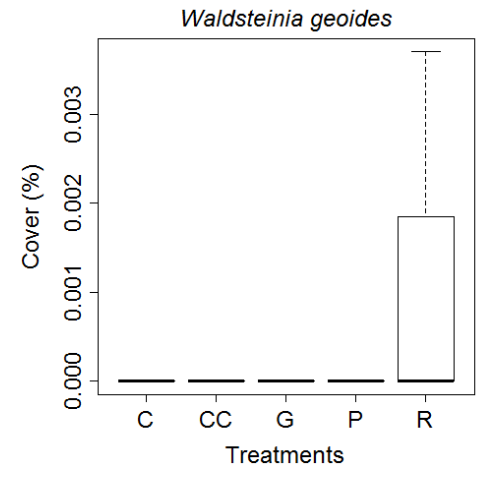

Supplement: MOESM3 [file 10342_2018_1154_MOESM3_ESM.pdf]
